# Supplementary material
Source: publisher figshare collection journal article supplement (https://acs.figshare.com/ndownloader/files/16707800)
Supplement: Supplementary file 1 [file 16707800]

## SUPPLEMENTARY INFORMATION

# Solution-processed-2D on 3D heterojunction UV-Visible photodetector for low light applications

*Gaurav Kumar, Nisha Prakash, Manjri Singh, Anusmita Chakravorty, Debdulal Kabiraj, Surinder P. Singh, Prabir Pal,<sup>§</sup> and Suraj P. Khanna\**

Gaurav Kumar, Nisha Prakash, Manjri Singh, Dr. Surinder P. Singh, Dr. Prabir Pal and Dr. Suraj P. Khanna

CSIR-National Physical Laboratory, Dr. K. S. Krishnan Road, New Delhi 110012, India

Nisha Prakash, Manjri Singh, Dr. Surinder P. Singh, Dr. Prabir Pal and Dr. Suraj P. Khanna  
Academy of Scientific and Innovative Research (AcSIR), CSIR-HRDC Campus, Ghaziabad, Uttar Pradesh 201002, India

Anusmita Chakravorty and Dr. Debdulal Kabiraj

Inter University Accelerator Centre, P.O. Box 10502, New Delhi 110067, India

Prabir Pal

Present address: CSIR-Central Glass and Ceramic Research Institute, Jadavpur, Kolkata 700032, India

<sup>§</sup>Email: Dr. Prabir Pal (palp@nplindia.org)

<sup>\*</sup>Email: Dr. Suraj P. Khanna (khanna@nplindia.org)

**Table 1.** Hall effect measurement data of the GaN substrate used here.

| Carrier Concentration (cm <sup>-3</sup> ) | Mobility (cm <sup>2</sup> /Vs) | Resistivity (Ω cm) |
|-------------------------------------------|--------------------------------|--------------------|
| – (5-7) × 10 <sup>16</sup>                | ~ 2 × 10 <sup>2</sup>          | ~0.35              |

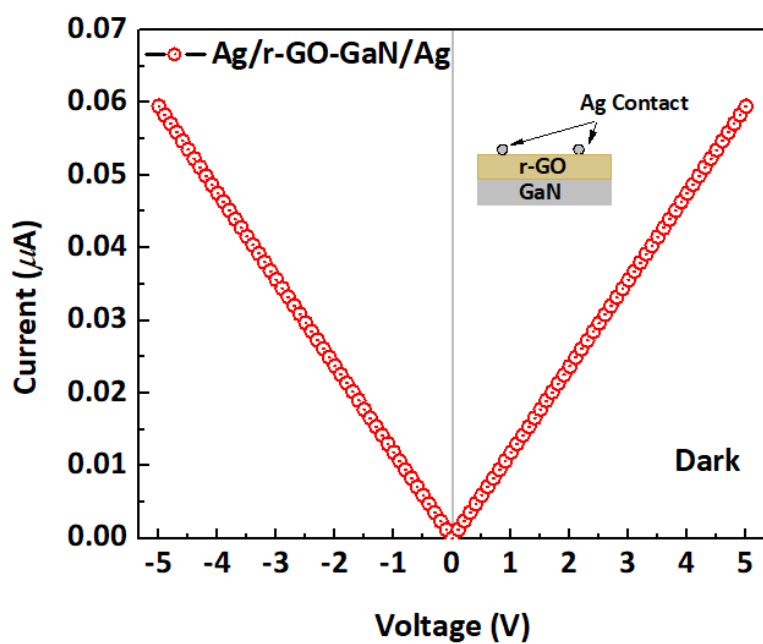

**Figure S1.** The I-V characteristics of the r-GO film deposited over GaN substrate showing the ohmic behaviour of the Ag contacts with r-GO film.

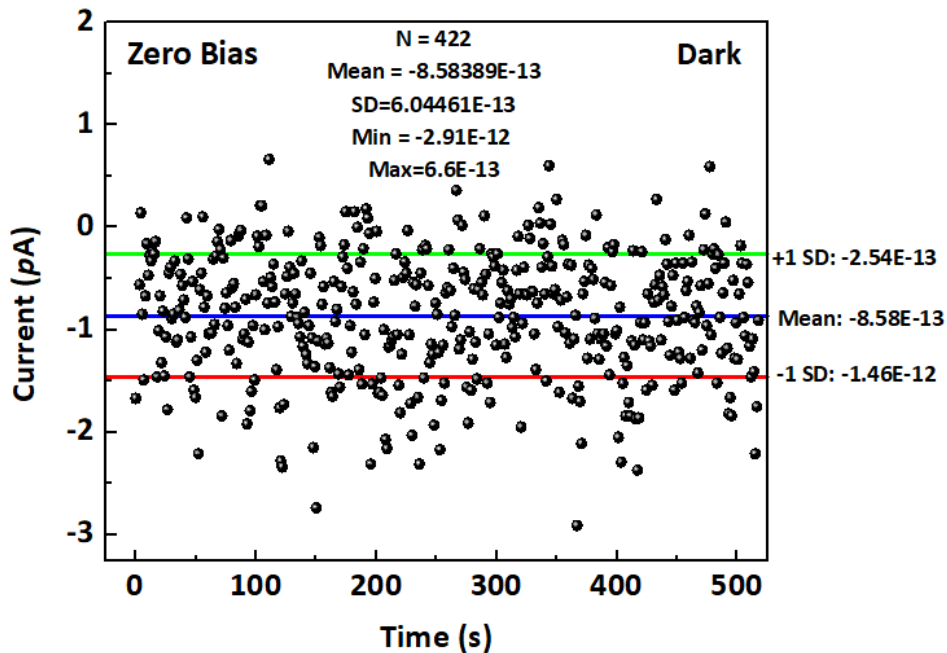

**Figure S2.** Dark Current statistics of the device at zero bias.

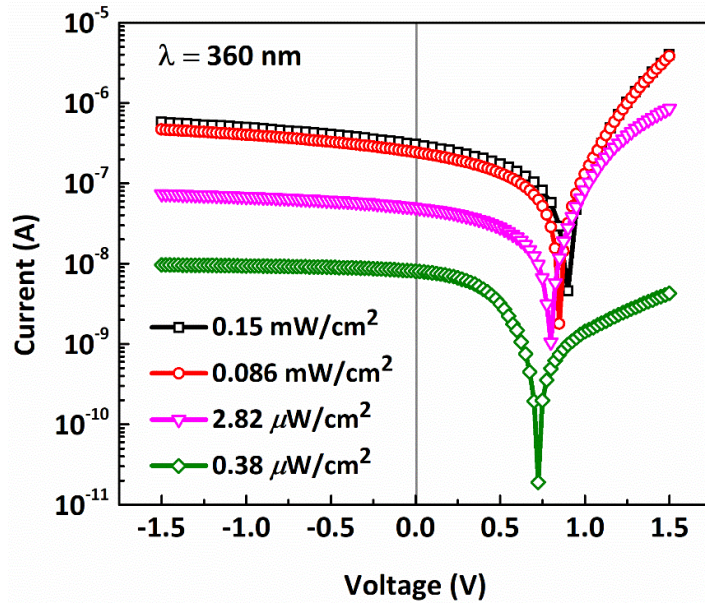

**Figure S3.** I-V characteristics of the device under different light intensity of 360 nm wavelength illumination. The  $V_{OC}$  was found to be 0.89, 0.85, 0.80, and 0.72 V for 0.15 mW/cm<sup>2</sup>, 0.086 mW/cm<sup>2</sup>, 2.82 μW/cm<sup>2</sup>, and 0.38 μW/cm<sup>2</sup>, respectively.

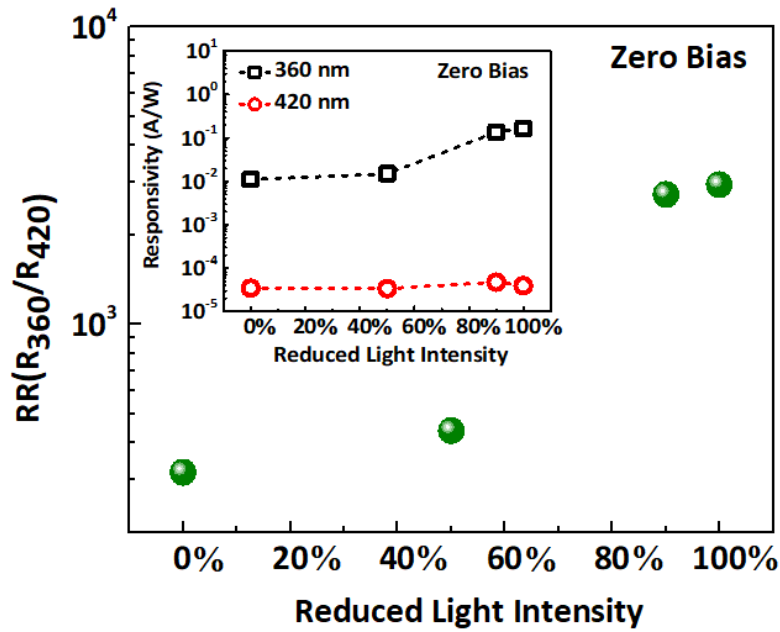

**Figure S4.** The UV-to-Visible Rejection Ratio parameter at different light intensities between the wavelength 360 and 420 nm. The inset shows the corresponding device responsivity values for the wavelength 360 and 420 nm.

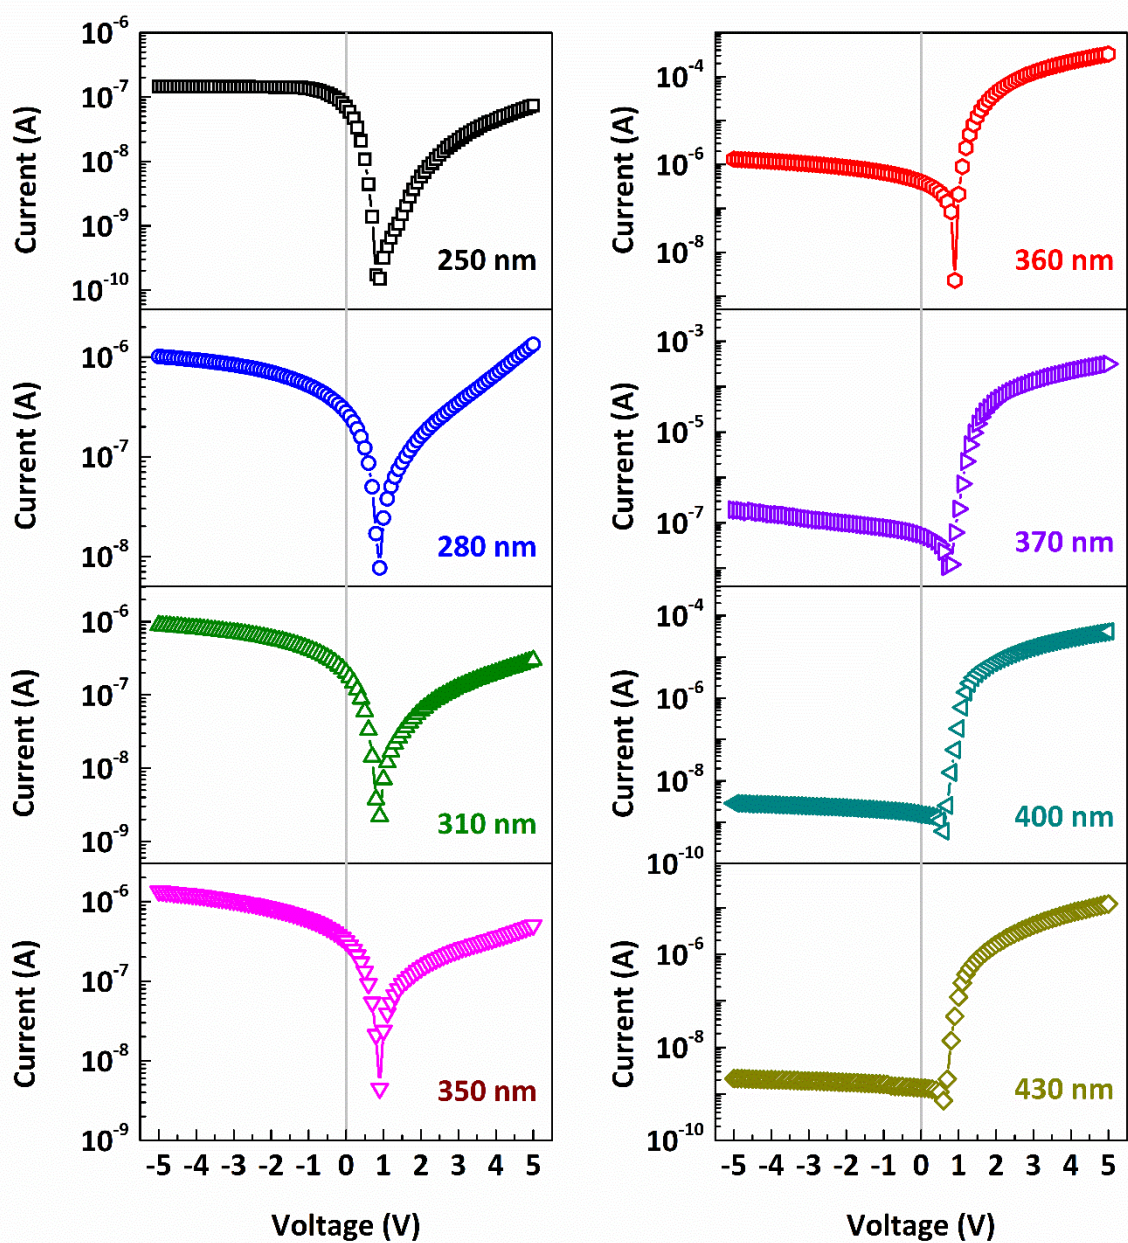

**Figure S5.** I-V characteristics of the device under different illumination wavelengths showing a transformation from quasi photoconductive ( $\lambda$  at 250 nm ( $0.01 \text{ mW cm}^{-2}$ ), 280 nm ( $0.083 \text{ mW cm}^{-2}$ ), 310 nm ( $0.082 \text{ mW cm}^{-2}$ ), 350 nm ( $0.146 \text{ mW cm}^{-2}$ )) to photodiode ( $\lambda$  at 360 nm ( $0.156 \text{ mW cm}^{-2}$ ), 370 nm ( $0.154 \text{ mW cm}^{-2}$ ), 400 nm ( $0.466 \text{ mW cm}^{-2}$ ), and 430 nm ( $0.50 \text{ mW cm}^{-2}$ )) behavior.
